# Supplementary material
Source: PubMed Central journal article supplement (PMC2664836)
Supplement: ja711415b-File002.pdf [file ja711415b-File002.pdf]

## Material and Methods

### *Materials*

Copper(II) sulfate pentahydrate (99.999%) and N-acetyl-tryptophanamide were purchased from Sigma-Aldrich and used without further purification.

### *Protein Expression and Purification*

The wild-type human  $\alpha$ -syn expression plasmid (pRK172) was provided by M. Goedert (Medical Council Research Laboratory of Molecular Biology, Cambridge, U.K.). A fluorescent Trp residue was introduced at an aromatic-residue position (F4) by site-directed mutagenesis. The reported Cu(II) binding ligand, His50 was removed and substituted with a Ser residue. All site-directed mutagenesis reactions were performed using a QuickChange kit (Stratagene). All mutations were confirmed by DNA sequencing (Caltech DNA Sequencing Core Facility). Bacterial cells (BL-21(DE3)pLysS, Invitrogen) were chemically transformed with plasmids containing desired mutations. All bacterial growths were under the selective pressure of 34 mg/L chloramphenicol and 100 mg/L ampicillin. Starter culture (25 mL) was inoculated with a freshly transformed single colony of bacterial cells, grown in LB media overnight at 30 °C, and used further to inoculate 1-L LB medium. As soon as the culture reached an  $OD_{600\text{ nm}} \sim 0.6-0.8$ , protein expression was induced with 0.5 mM IPTG for 6 h at 30 °C. Recombinant  $\alpha$ -syn was purified according to published procedures.<sup>1</sup> Protein concentrations were determined using a molar extinction coefficient estimated on the basis of amino-acid content:  $\epsilon_{280\text{ nm}} = 10,810\text{ M}^{-1}\text{cm}^{-1}$  (F4W and F4W/H50S). The purity of all protein samples was assessed by SDS-PAGE on a Pharmacia Phastsystem visualized by silver-staining methods. The protein molecular weights were confirmed by ESI-MS (Caltech Protein/Peptide Microanalytical Laboratory). Absorption and luminescence spectra were measured on a Hewlett-Packard 8452 diode array spectrophotometer and a Spex Fluorolog3 spectrofluorimeter, respectively. All purified proteins were concentrated using Centriprep YM-3(MWCO 3kD) (Millipore) and stored at  $-80\text{ }^{\circ}\text{C}$ .

### *Copper(II) Titrations*

Copper(II) concentrations were determined spectrophotometrically ( $\epsilon_{710\text{ nm}} = 12\text{ M}^{-1}\text{cm}^{-1}$ ). Prior to experiments, all protein samples were filtered through Microcon YM-100 (MWCO 100kD) (Millipore) spin filter units to remove oligomeric material and exchanged into the appropriate buffer (20 mM MOPS, 100 mM NaCl, pH 7) using gel filtration chromatography (PD-10 column, Amersham-Biosciences). All titrations were performed on deoxygenated samples to avoid deleterious metal-oxygen chemistry and photobleaching. Buffer solutions were filtered (0.22  $\mu\text{m}$ ) to remove any particulate matter. Tryptophan was excited at 295 nm and fluorescence was monitored from 300 to 600 nm. All experiments were conducted at 25 °C using a temperature-controlled cuvette holder.

### *Time-resolved Fluorescence Measurements*

Fluorescence decay kinetics measurements were carried out as previously described.<sup>1</sup> Protein samples were deoxygenated by repeated evacuation/Ar-fill cycles on a Schlenk line. Buffer solutions were filtered (0.22  $\mu\text{m}$ ) to remove any particulate matter.

A polarized laser pulse (35° from vertical) from the third harmonic (292 nm) of a regeneratively amplified femtosecond Ti:sapphire laser (Spectra-Physics) was used as an excitation source and a picosecond streak camera (Hamamatsu C5680) was used in the photon-counting mode for detection. Trp emission was selected by using a combination of dielectric and color filters ( $325 \leq \lambda \leq 400$  nm). All experiments were conducted at 25 °C using a temperature-controlled cuvette holder. All protein samples were filtered through Microcon YM-100 (MWCO 100kD) (Millipore) spin filter units to remove oligomeric material prior to experiments.

## Data Analysis

### Fluorescence Decay Kinetics

We describe the Trp fluorescence decay kinetics with a discrete distribution of exponential decay rate constants:

$$I(t) = \sum_k P(k) e^{-kt}$$

where  $P(k)$  is the probability of finding a W fluorophore in the protein ensemble with a decay rate constant of  $k$ .

We define average excited state lifetimes as the integral over the normalized fluorescence decay curves:

$$\langle \tau \rangle = \int \frac{I(t)}{I(t=0)} dt = \sum_k \frac{P(k)}{k}$$

We have fit kinetics data by using a MATLAB (Mathworks, Natick, MA) algorithm (LSQNONNEG) that minimizes the sum of the squared deviations ( $\chi^2$ ) between observed and calculated values of  $I(t)$ , subject to a nonnegativity constraint.

### Cu(II) binding curves

To estimate a binding constant for the dynamic quenching process, we assume a two state binding model:

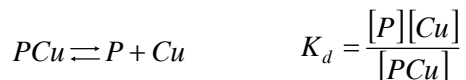

where  $P \equiv$  free  $\alpha$ -syn,  $Cu \equiv$  free copper,  $PCu \equiv$  1:1 complex of copper and  $\alpha$ -syn.

Mass balance gives:

$$[P] = [P]_0 - [PCu]$$

$$[Cu] = [Cu]_0 - [PCu]$$

Substitute into expression for  $K_d$ :

$$K_d = \frac{([P]_0 - [PCu])([Cu]_0 - [PCu])}{[PCu]}$$

Rearrange:

$$[PCu]^2 - ([P]_0 + [Cu]_0 + K_d)[PCu] + [P]_0[Cu]_0 = 0$$

Solve for concentration of copper-bound  $\alpha$ -syn:

$$[PCu] = \frac{1}{2}([P]_0 + [Cu]_0 + K_d) - \frac{1}{2}\sqrt{([P]_0 + [Cu]_0 + K_d)^2 - 4[P]_0[Cu]_0}$$

The total time-resolved fluorescence intensity from  $P$  and  $PCu$  is given by the following relation:

$$I(t) = \frac{[P]}{[P]_0} \sum_k P(k)_{[P]} e^{-kt} + \frac{[PCu]}{[P]_0} \sum_k P(k)_{[PCu]} e^{-kt} = \sum_k \left[ \frac{[P]}{[P]_0} P(k)_{[P]} + \frac{[PCu]}{[P]_0} P(k)_{[PCu]} \right]$$

The average decay time is given by:

$$\langle \tau \rangle = \int \frac{I(t)}{I(t=0)} dt = \frac{[P]}{[P]_0} \sum_k \frac{P(k)_{[P]_0}}{k} + \frac{[PCu]}{[P]_0} \sum_k \frac{P(k)_{[PCu]_0}}{k} = \frac{[P]}{[P]_0} \langle \tau \rangle_0 + \frac{[PCu]}{[P]_0} \langle \tau \rangle_{[PCu]}$$

Substituting for  $[P]$  and rearranging gives:

$$\frac{\langle \tau \rangle}{\langle \tau \rangle_0} = 1 + \left( \frac{\langle \tau \rangle_{[PCu]} - 1}{\langle \tau \rangle_0} \right) \frac{[PCu]}{[P]_0} = 1 + \left( \frac{\langle \tau \rangle_{[PCu]} - 1}{\langle \tau \rangle_0} \right) \frac{\frac{1}{2}([P]_0 + [Cu]_0 + K_d) - \frac{1}{2}\sqrt{([P]_0 + [Cu]_0 + K_d)^2 - 4[P]_0[Cu]_0}}{[P]_0}$$

where  $\langle \tau \rangle_{[PCu]}$  is the average fluorescence lifetime of pure  $[PCu]$ .

To estimate a binding constant for the static quenching process, we used time-resolved fluorescence data collected with comparable protein concentrations and excitation intensities. We define the fractional quenching using the following expression:

$$\chi([Cu]_0) = \frac{I(t=0, [Cu]_0=0) - I(t=0, [Cu]_0)}{I(t=0, [Cu]_0=0)}$$

An apparent dissociation constant for the static quenching process is given by:

$$\chi([Cu]_0) = \chi_{[PCu]} \frac{[PCu]}{[P]_0} = \chi_{[PCu]} \frac{\frac{1}{2}([P]_0 + [Cu]_0 + K_d) - \frac{1}{2}\sqrt{([P]_0 + [Cu]_0 + K_d)^2 - 4[P]_0[Cu]_0}}{[P]_0}$$

where  $\chi_{[PCu]}$  is the fractional quenching for pure [PCu].

Data were fit to the above equation using Igor Pro 6.01 (Wavemetrics, Inc. Oregon).

<sup>1</sup>Lee, J. C.; Langen, R.; Hummel, P. A.; Gray, H. B.; Winkler, J. R. *Proc. Natl. Acad. Sci. USA* **2004**, *101*, 16466-16471.

<sup>2</sup>Istratov, A. A. & Vyvenko, O. F. (1999) *Review of Scientific Instruments* **70**, 1233-1257.

<sup>3</sup>Livesey, A. K., Delaye, M., Licinio, P. & Brochon, J. C. (1987) *Faraday Discussions*, 247-258.

<sup>4</sup>Lawson, C. L. & Hanson, R. J. (1974) *Solving Least Squares Problems* (Prentice, Hall, Englewood Cliffs, NJ).

### Complete Reference Citations:

(4) Polymeropoulos, M. H.; Lavedan, C.; Leroy, E.; Ide, S.; Dehejia, A.; Dutra, A.; Pike, B.; Root, H.; Rubenstein, J.; Boyer, R.; Stenroos, E.; Chandrasekharappa, S.; Athanassiadou, A.; Papapetropoulos, T.; Johnson, W.; Lazzarini, A.; Duvoisin, R.; DiIorio, G.; Golbe, L.; Nussbaum, R. *Science* **1997**, *276*, 2045.

(5) Singleton, A. B.; Farrer, M.; Johnson, J.; Singleton, A.; Hague, S.; Kachergus, J.; Hulihan, M.; Peuralinna, T.; Dutra, A.; Nussbaum, R.; Lincoln, S.; Crawley, A.; Hanson, M.; Maraganore, D.; Adler, C.; Cookson, M. R.; Muentner, M.; Baptista, M.; Miller, D.; Blancato, J.; Hardy, J.; Gwinn-Hardy, K. *Science* **2003**, *302*, 841.
