# Supplementary material
Source: PubMed Central journal article supplement (PMC2664836)
Supplement: ja711415b-File003.pdf [file ja711415b-File003.pdf]

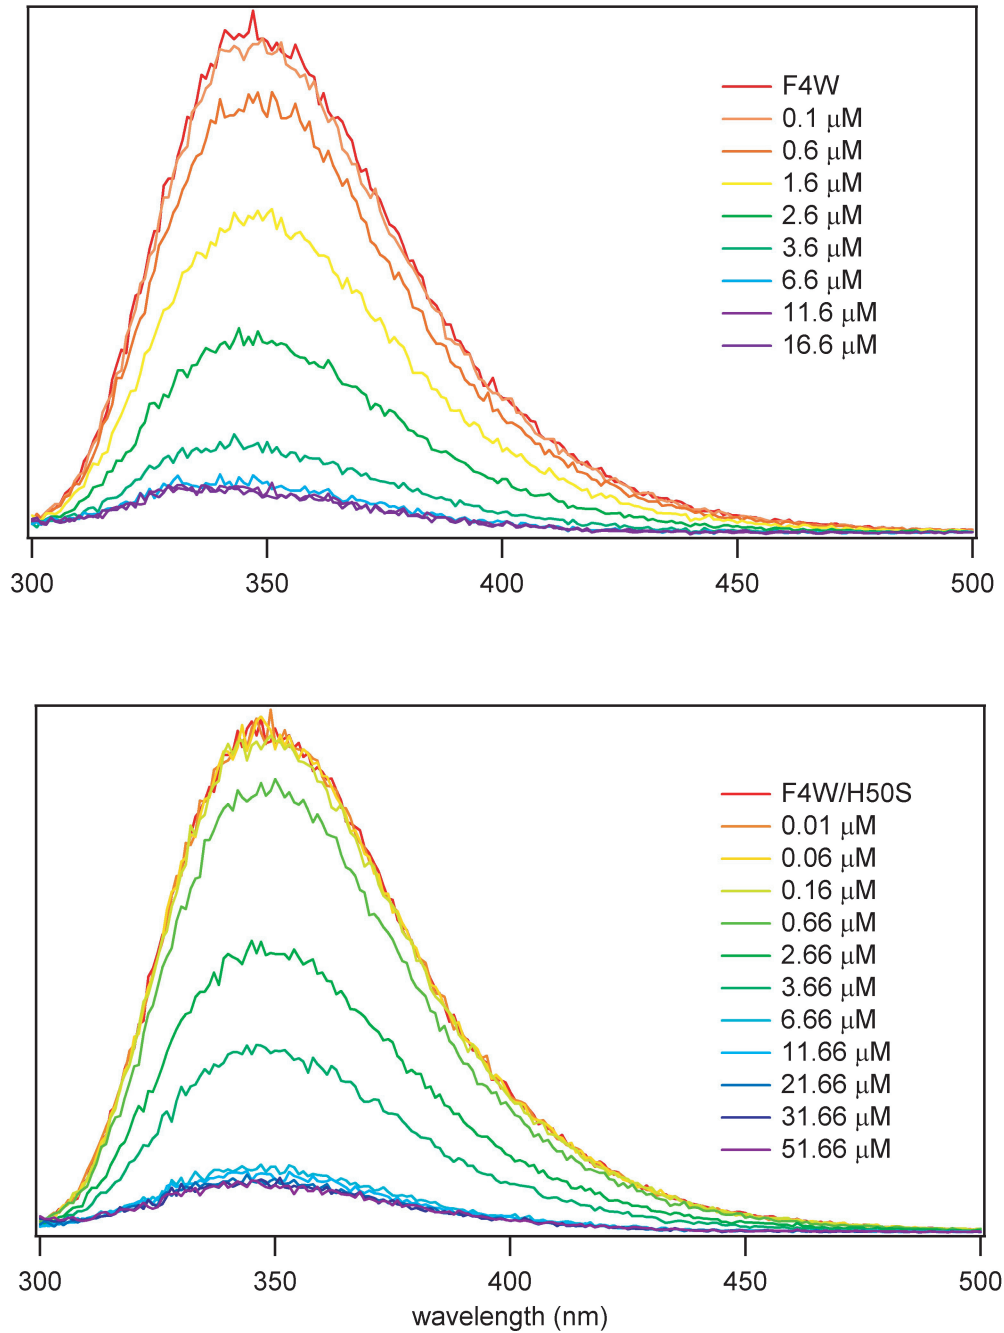

Figure 1S. Fluorescence of Trp-containing synuclein as a function of Cu(II) added. [protein]=5  $\mu$ M, in 20 mM MOPS, 100 mM NaCl, pH 7. Excited at 295 nm.

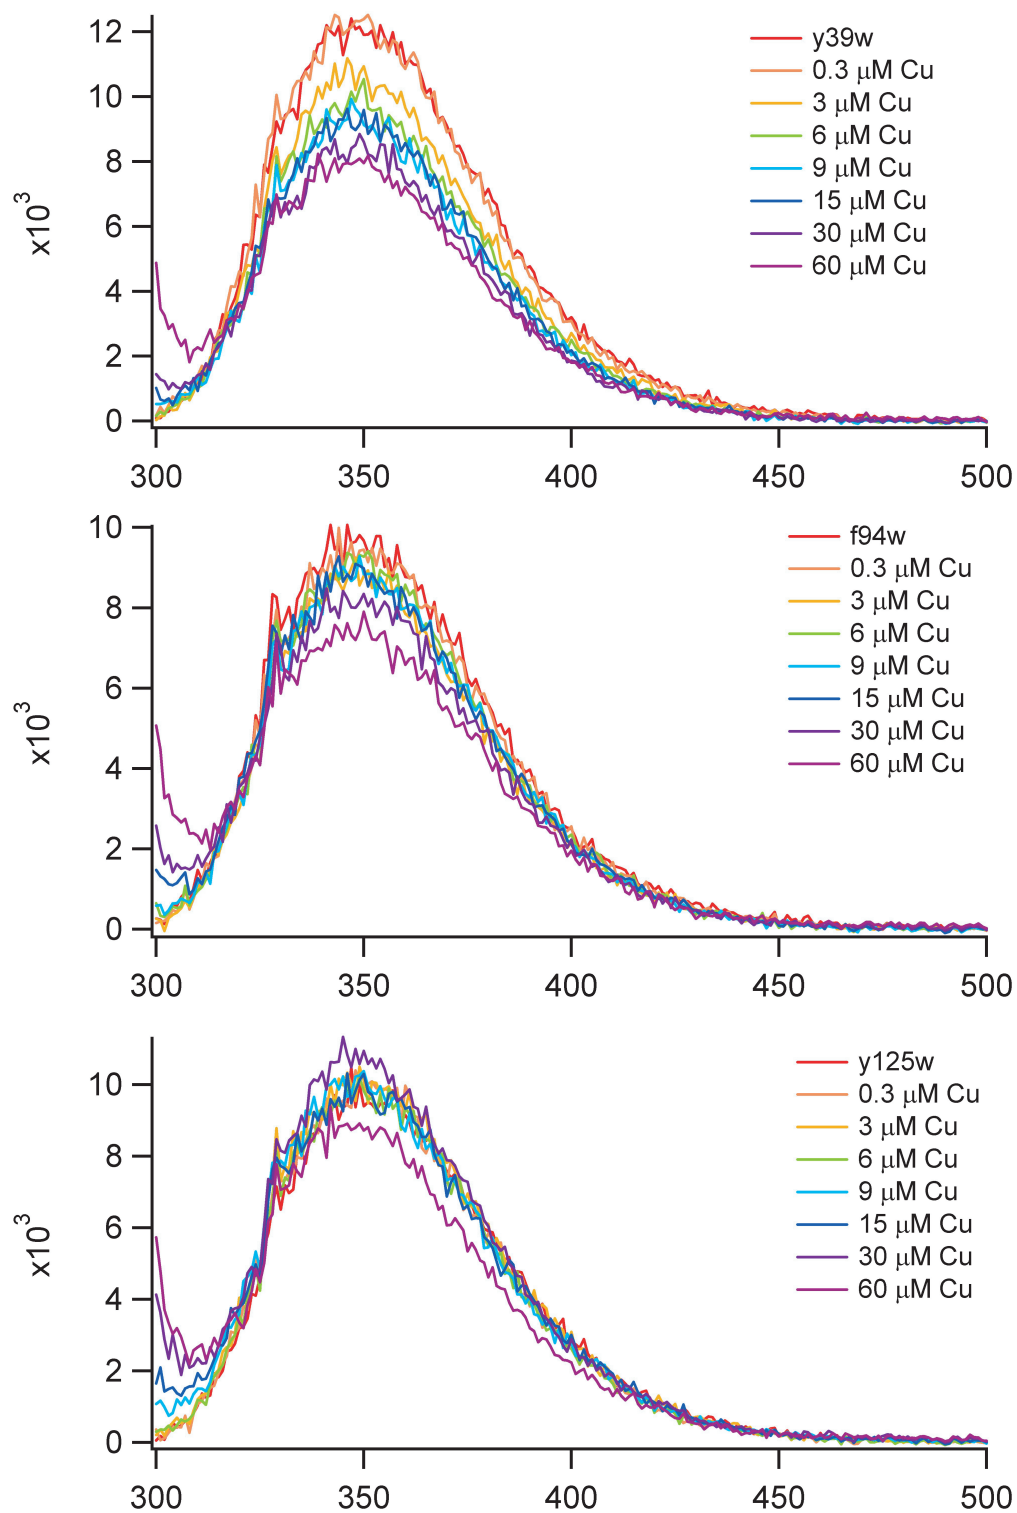

Figure2S. Fluorescence of Trp-containing synuclein as a function of Cu(II) added. [protein]=1.6-2  $\mu\text{M}$ , in 20 mM MOPS, 100 mM NaCl, pH 7. Excited at 295 nm.

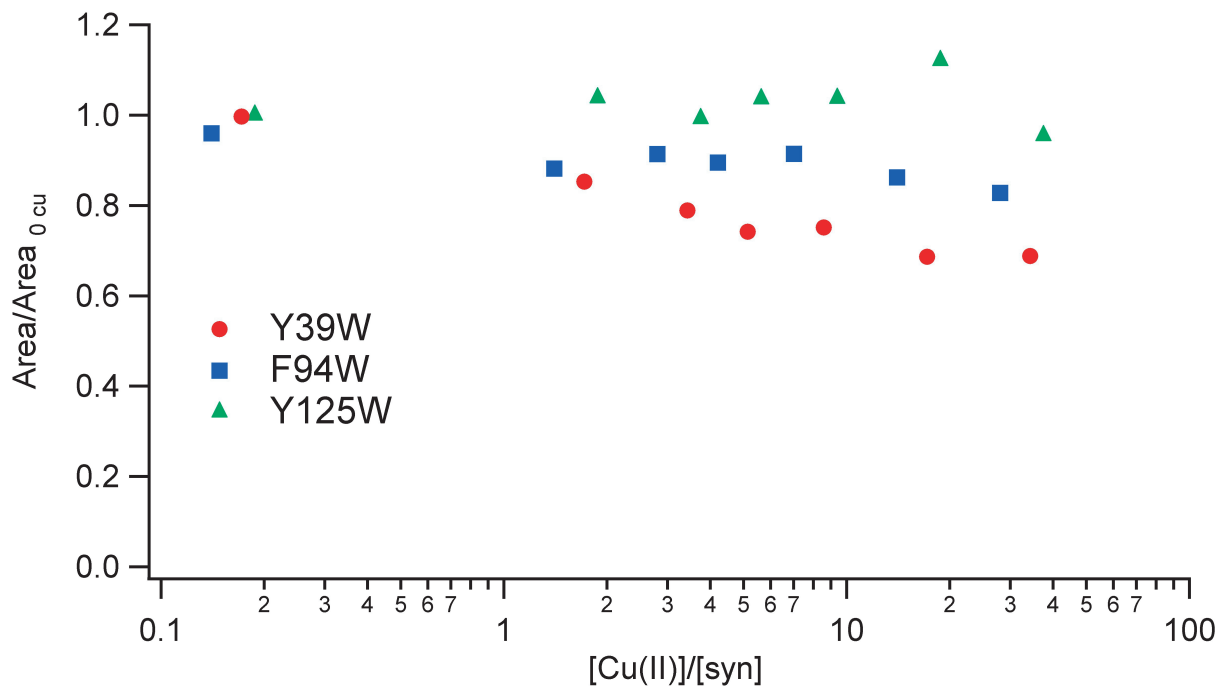

Figure 3S. Change of fluorescence intensity in three Trp  $\alpha$ -synuclein variants as a function of Cu(II) added.
