# Supplementary material
Source: PubMed Central journal article supplement (PMC2664836)
Supplement: ja711415b-File004.pdf [file ja711415b-File004.pdf]

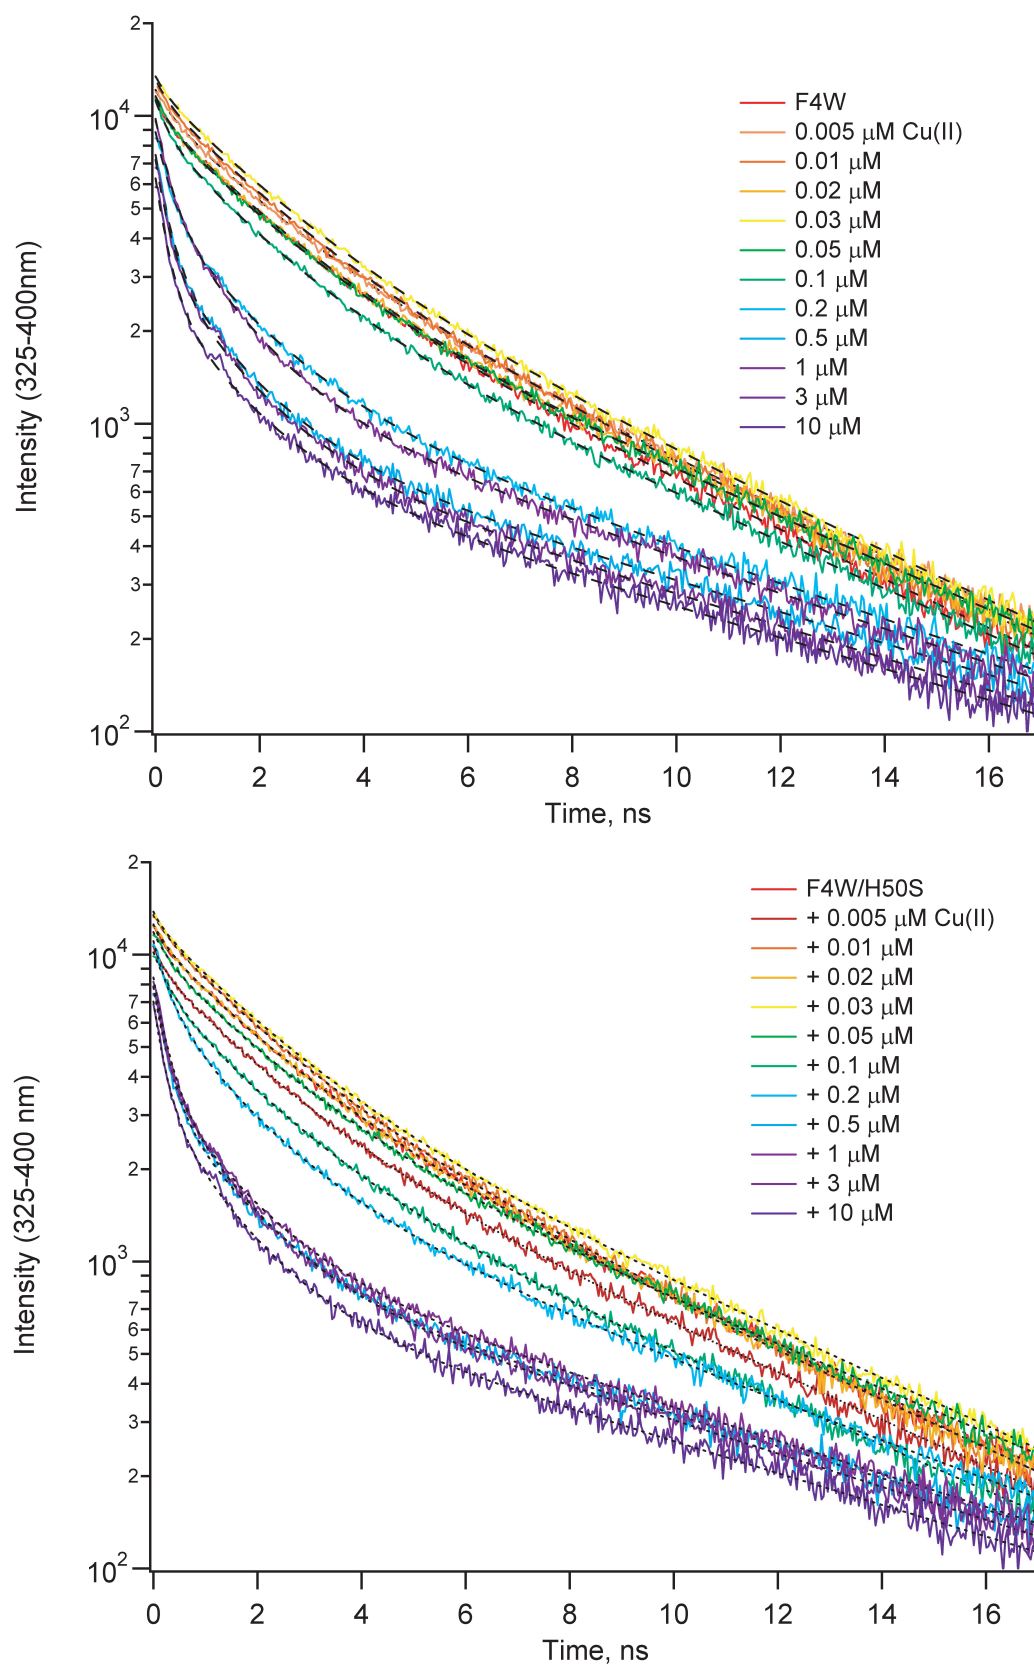

Figure 4S. Trp4 fluorescence decay kinetics as a function of Cu(II) added. F4W (top) and F4W/H50S (bottom); [protein]= 100 nM in 20 mM MOPS, 100 mM NaCl, pH 7. Dotted lines are NNLS fits.
