# Supplementary material
Source: PubMed Central journal article supplement (PMC2664836)
Supplement: ja711415b-File005.pdf [file ja711415b-File005.pdf]

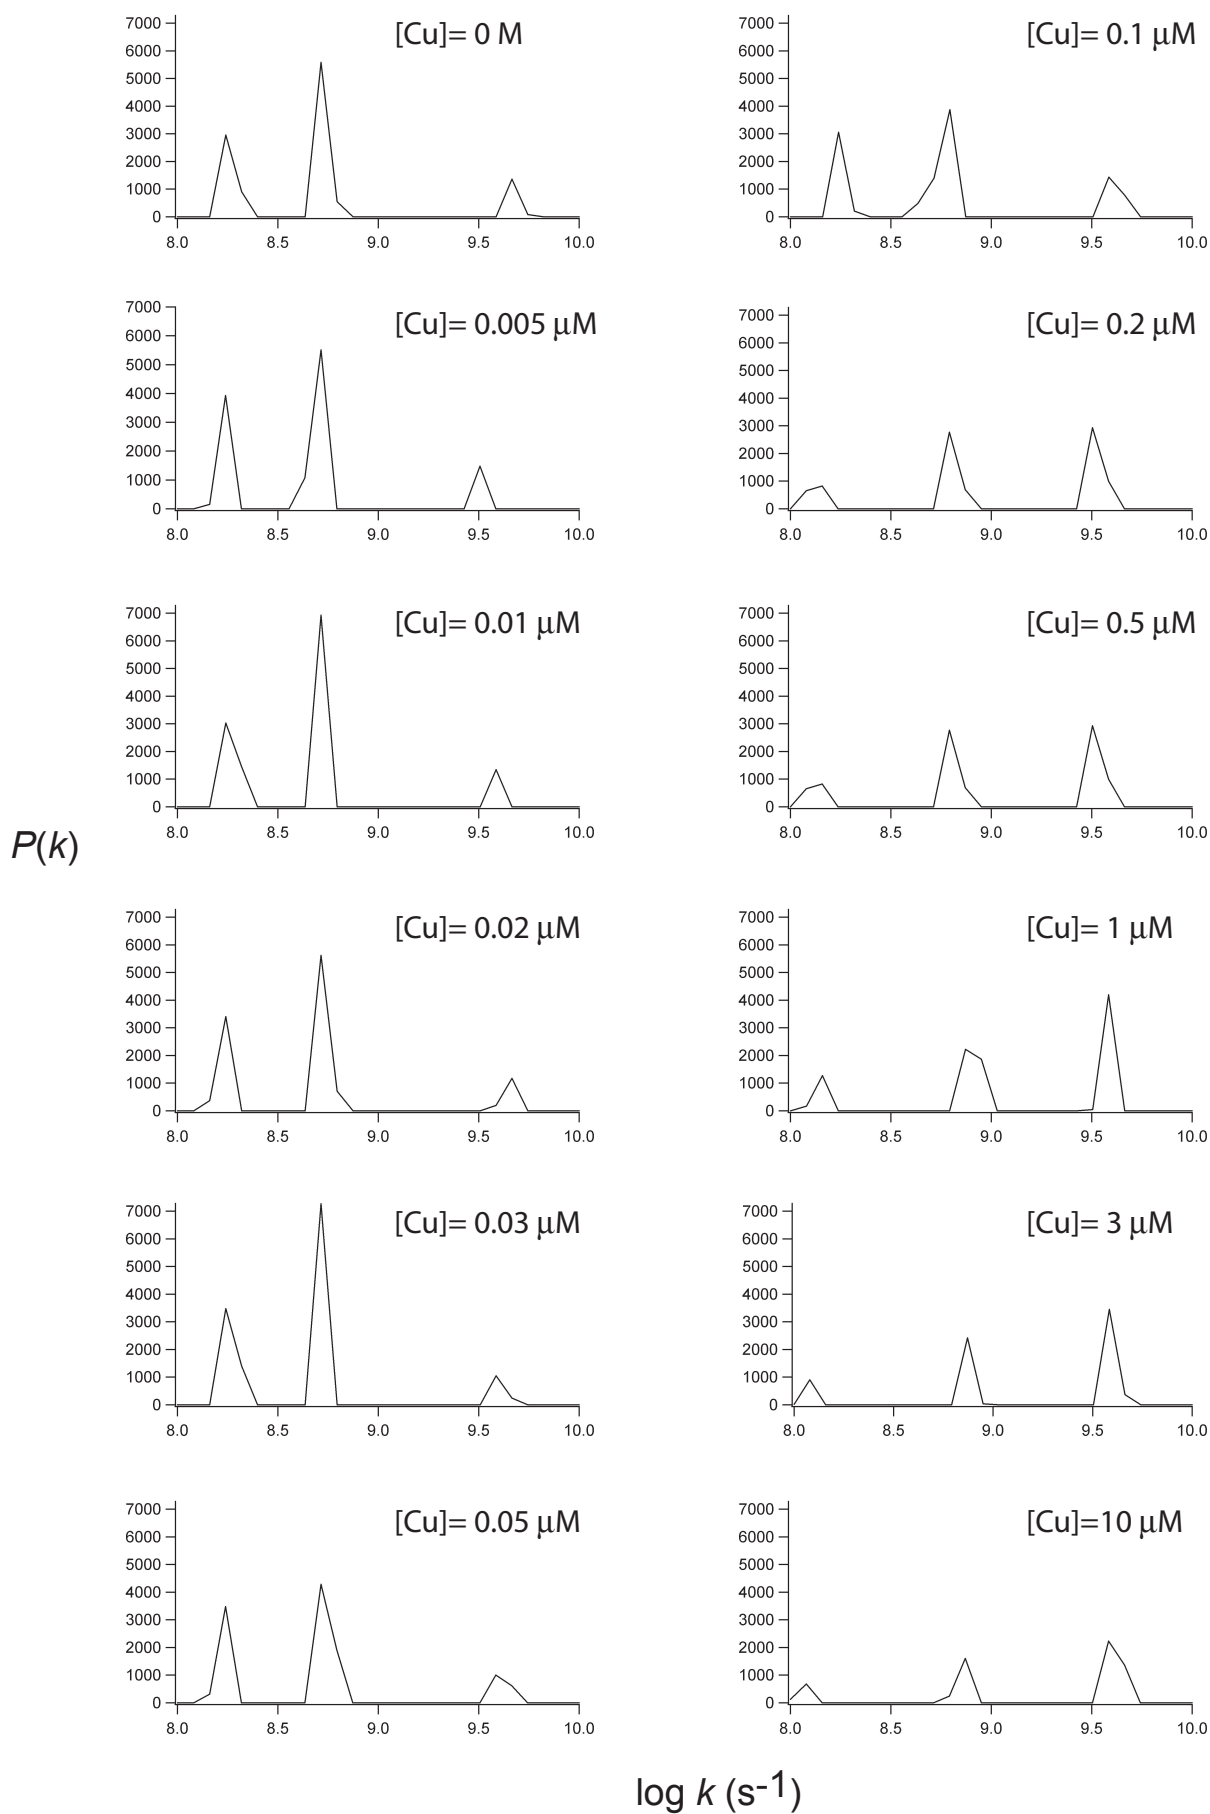

Figure S5. Fits to Trp4 decay kinetics as a function of Cu(II) added. [F4W syn]=100 nM in 20 mM MOPS, 100 mM NaCl, pH 7.

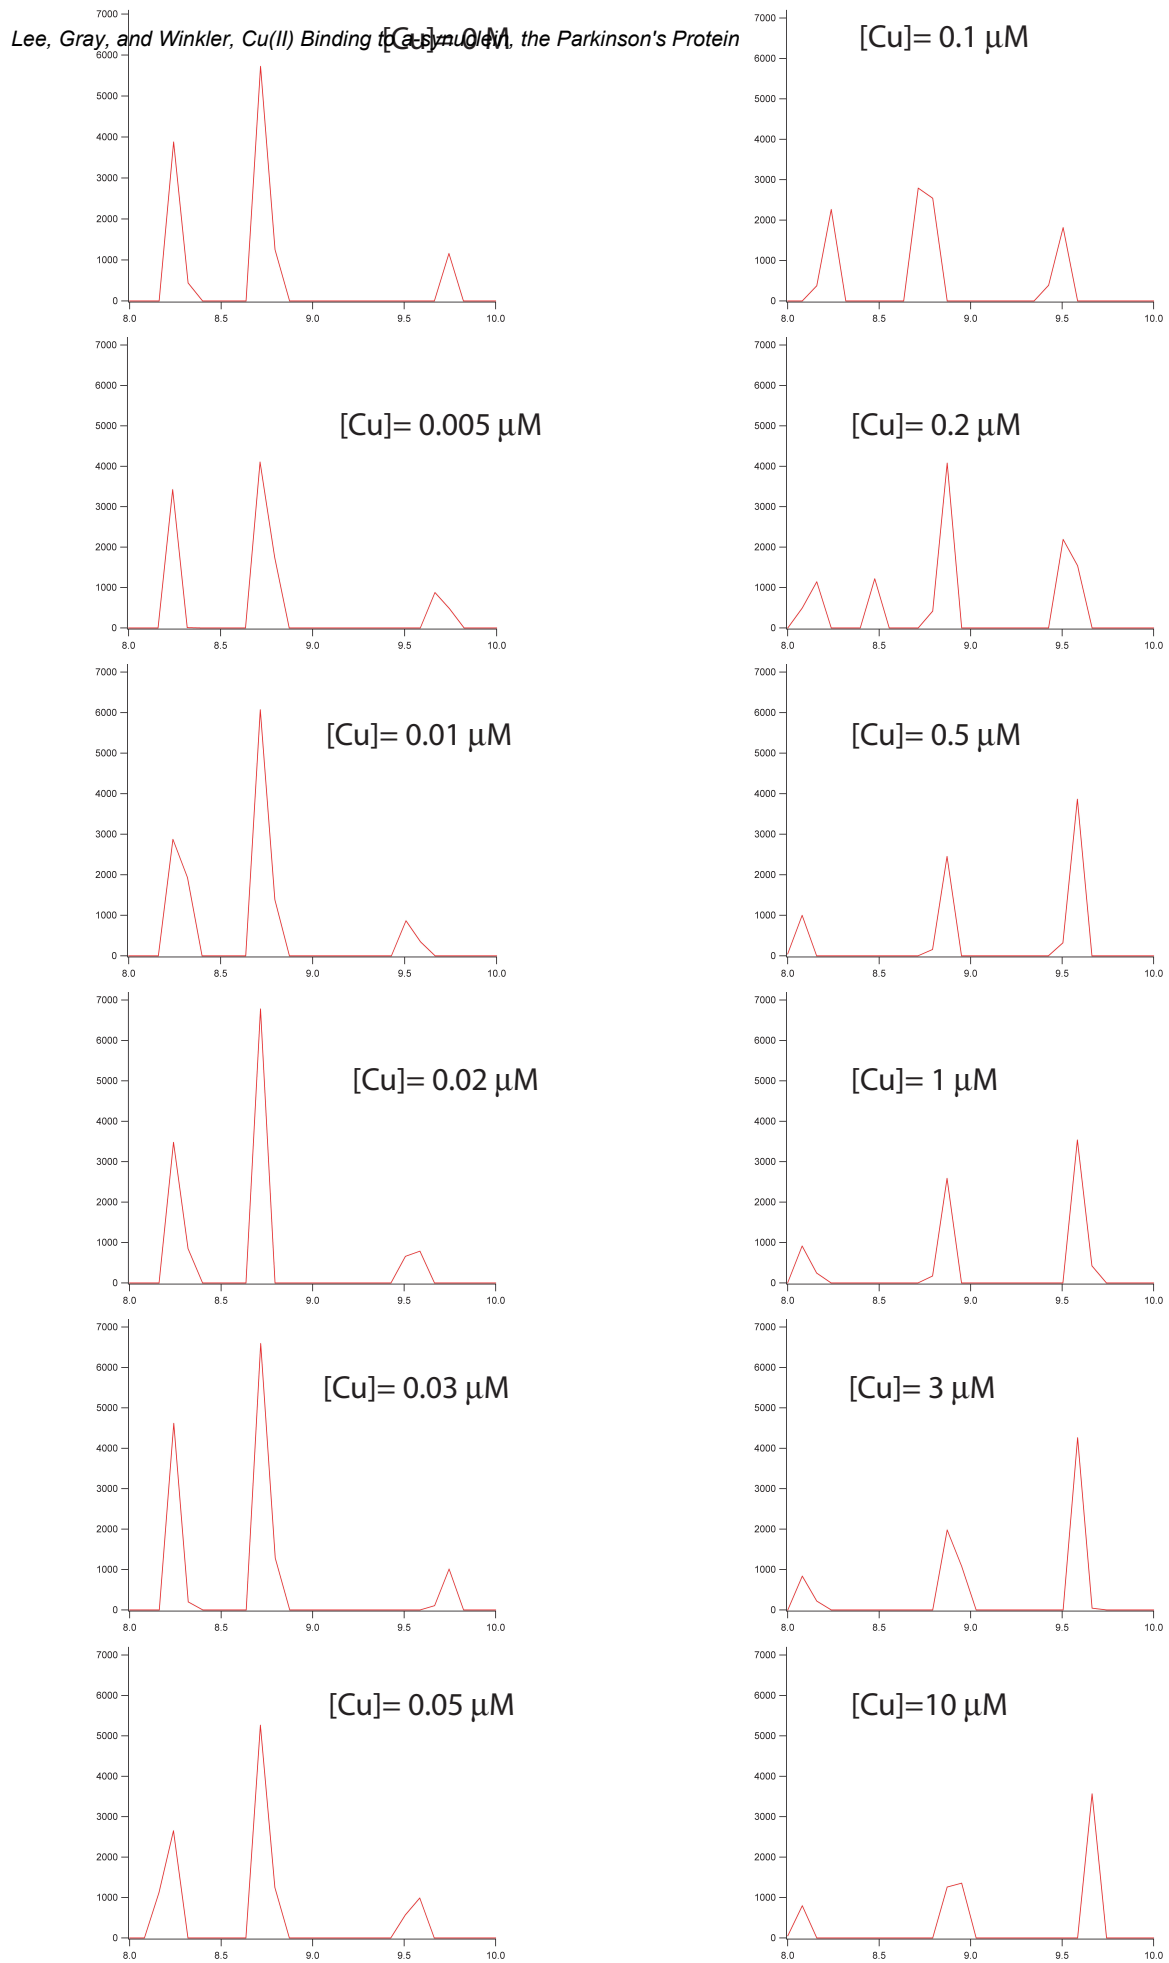

Figure 6S. Fits to Trp4 decay kinetics as a function of Cu(II) added. [F4W/H50S syn]=100 nM in 20 mM MOPS, 100 mM NaCl, pH 7.
